# Supplementary material
Source: publisher figshare collection journal article supplement (https://acs.figshare.com/ndownloader/files/26674330)
Supplement: Supplementary file 1 [file 26674330]

Polyvinylidene fluoride derived-carbon confined microcrystalline graphite with  
improved cycling life and rate performance for potassium-ion batteries

Linan Yang <sup>a</sup>, Yun Zhao <sup>a \*</sup>, Lijuan Cao <sup>b</sup>, Huili Chen <sup>a</sup>, Gaoyi Han <sup>a</sup>

<sup>a</sup> *Institute of Molecular Science, Key Laboratory of Materials for Energy Conversion  
and Storage of Shanxi Province, Shanxi University, Taiyuan 030006, PR China*

<sup>b</sup> *CAS Key Laboratory of Carbon Materials, National Engineering Laboratory for  
Carbon Fiber Technology, Institute of Coal Chemistry, Chinese Academy of Sciences,  
Taiyuan, 030001, PR China*

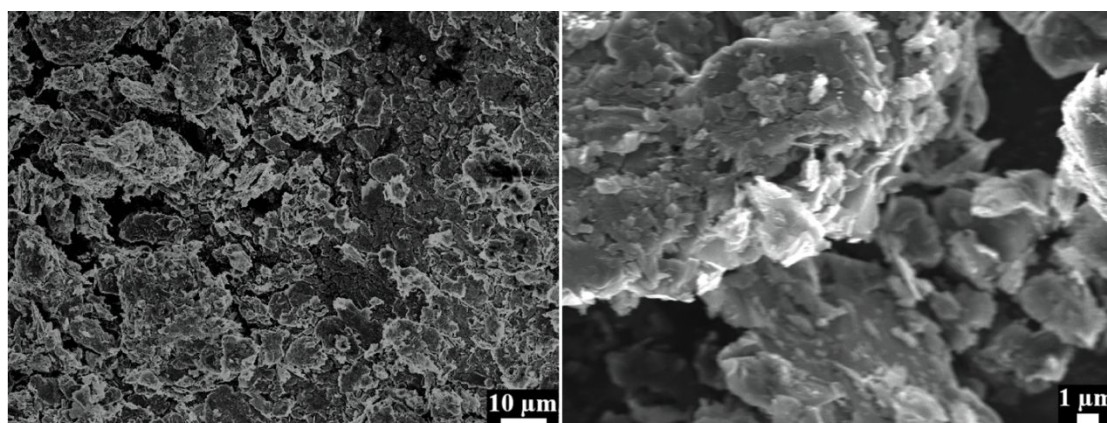

**Fig. S1** SEM images of the pristine NMG.

---

\* Corresponding author.  
E-mail: zhaoyun@sxu.edu.cn (Y. Zhao).

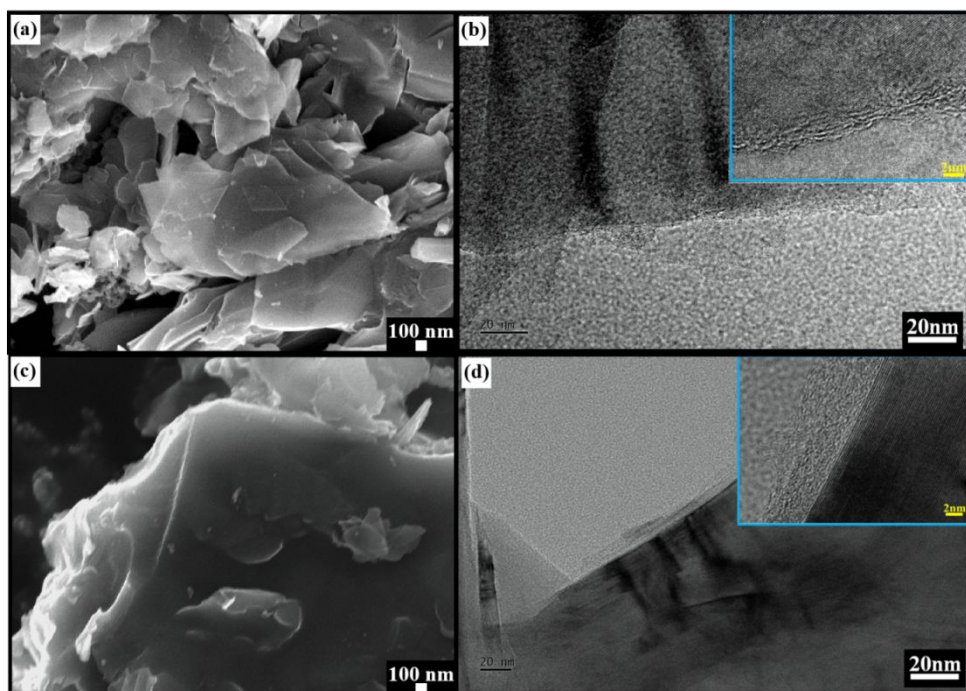

**Fig. S2** (a) SEM and (b) TEM images of FC@NMG-1. (c) and (d) SEM and TEM images of FC@NMG-5. The inset of (b) and (d) are the corresponding HRTEM images.

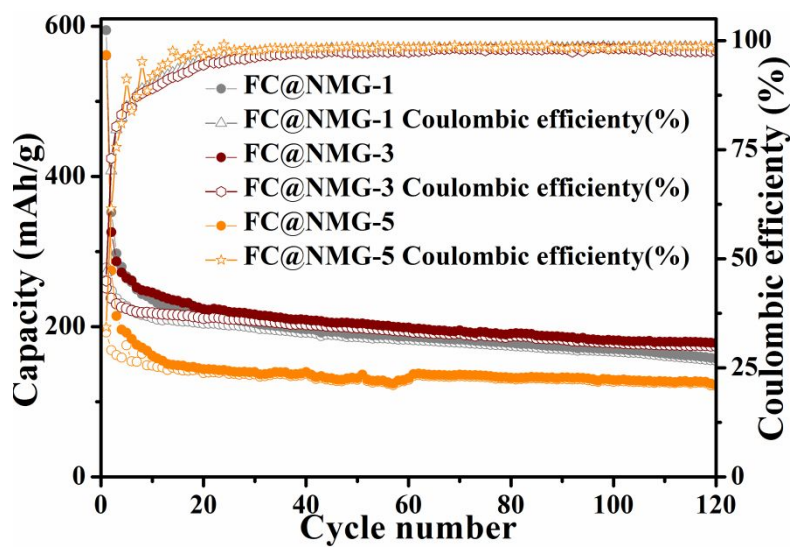

**Fig. S3** Cycling performance comparison among FC@NMG-1, FC@NMG-3 and FC@NMG-5 at a current density of  $0.1 \text{ A g}^{-1}$ .

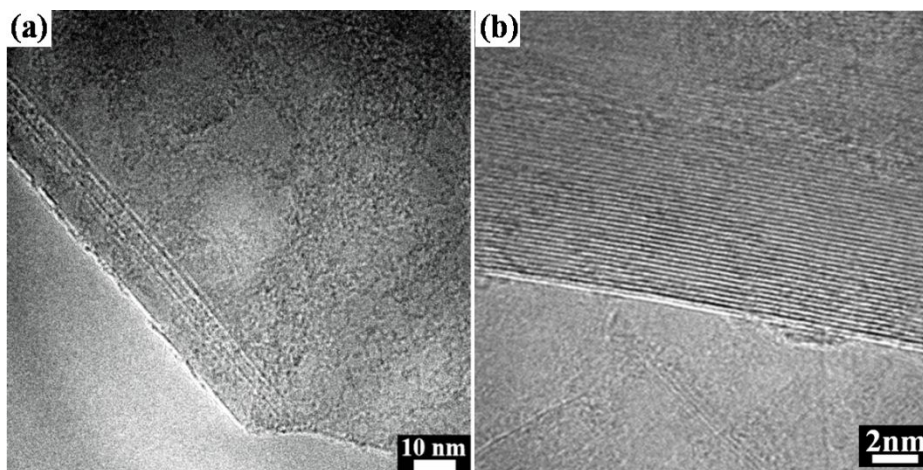

**Fig. S4** Typical TEM image (a) and HRTEM image (b) of the pristine NMG.

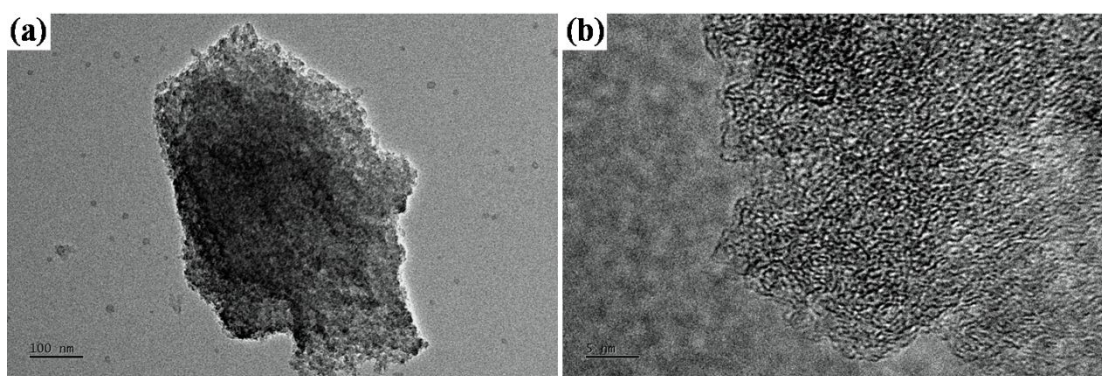

**Fig. S5** (a) TEM and (b) HRTEM images of the pure FC.

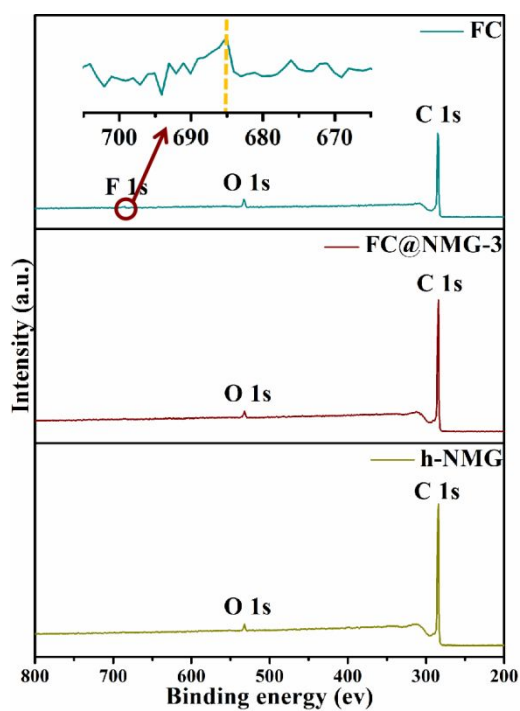

**Fig. S6** XPS survey spectra of the FC@NMG-3 composite, h-NMG and FC, respectively.



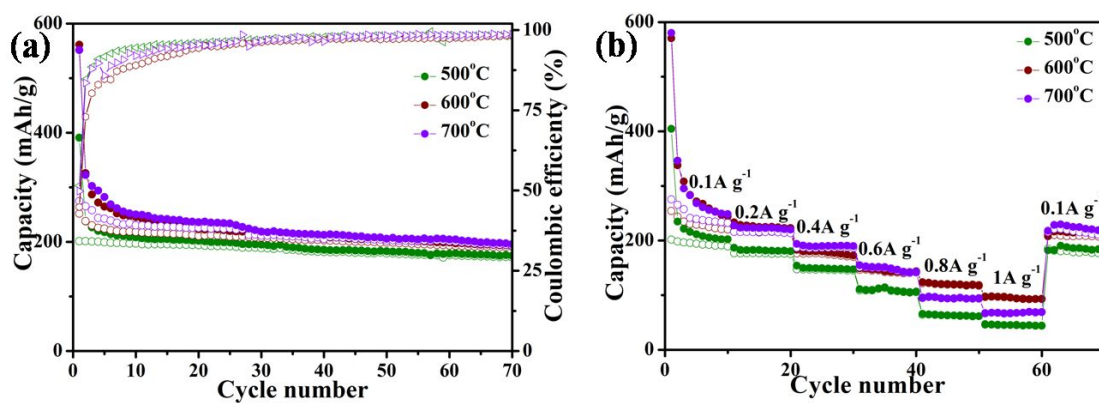

**Fig. S7** (a) Cycling stability and (b) Rate performance of fluorine-doped NMG-3 composites with different annealing temperatures.

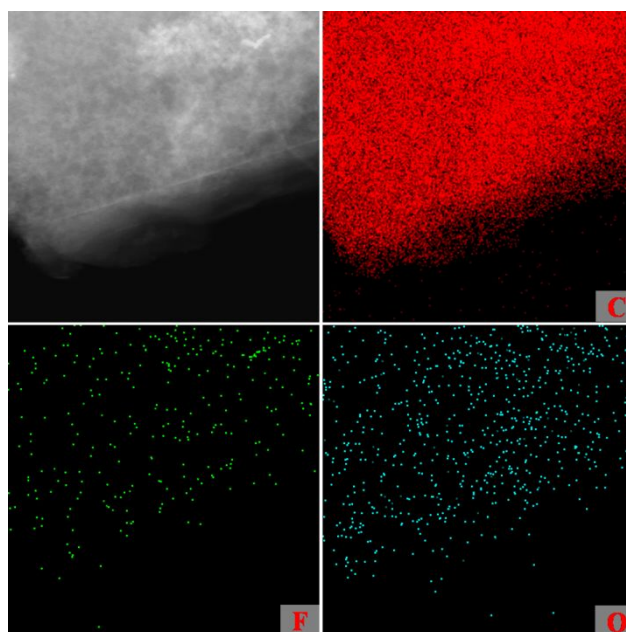

**Fig. S8** TEM elemental mapping of C, F and O in the FC@NMG composite.

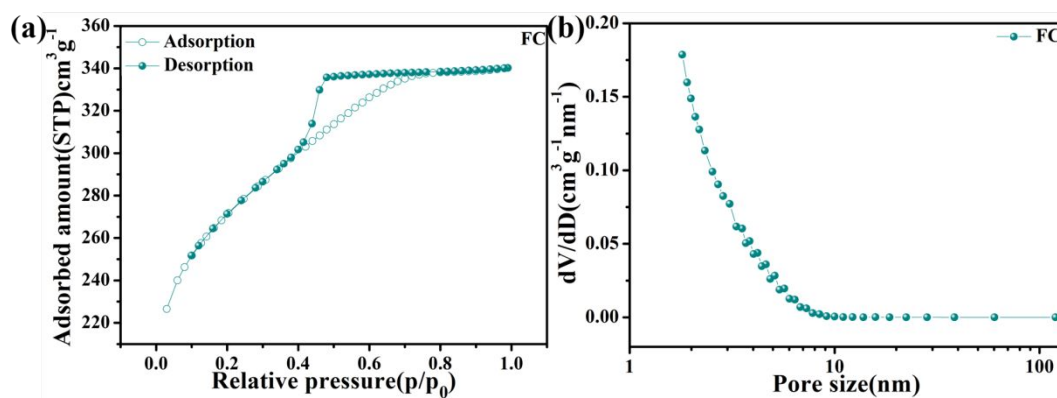

**Fig. S9** (a) N<sub>2</sub> adsorption/desorption isotherms and (b) pore size distribution curves of FC.

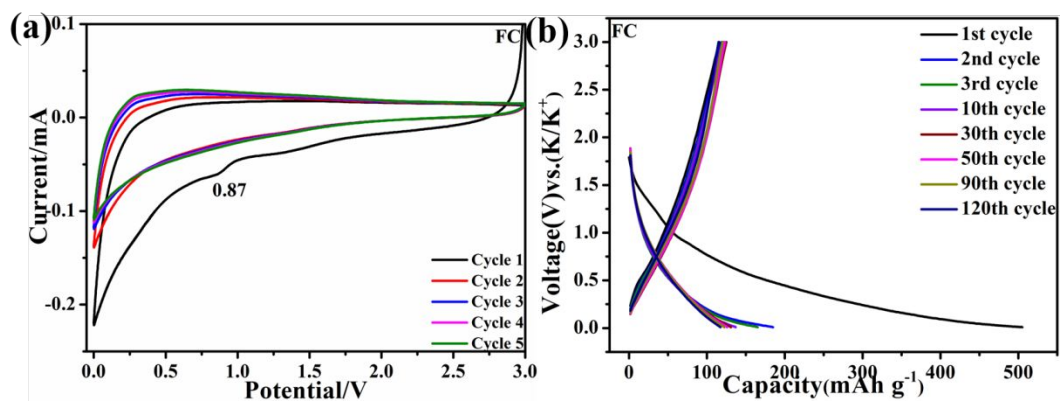

**Fig. S10** (a) CV curves and (b) Galvanostatic discharge-charge profiles at a current density of 0.1 A g<sup>-1</sup> for FC.

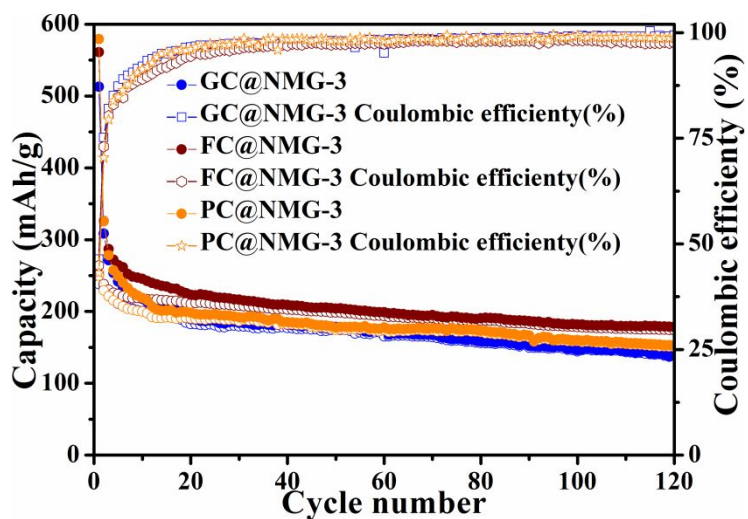

**Fig. S11** Cycling performances at a current density of 0.1 A g<sup>-1</sup> of FC@NMG-3, glucose derived carbon coated NMG (GC@NMG-3) and phenolic resin derived carbon coated NMG (PC@NMG-3), respectively.

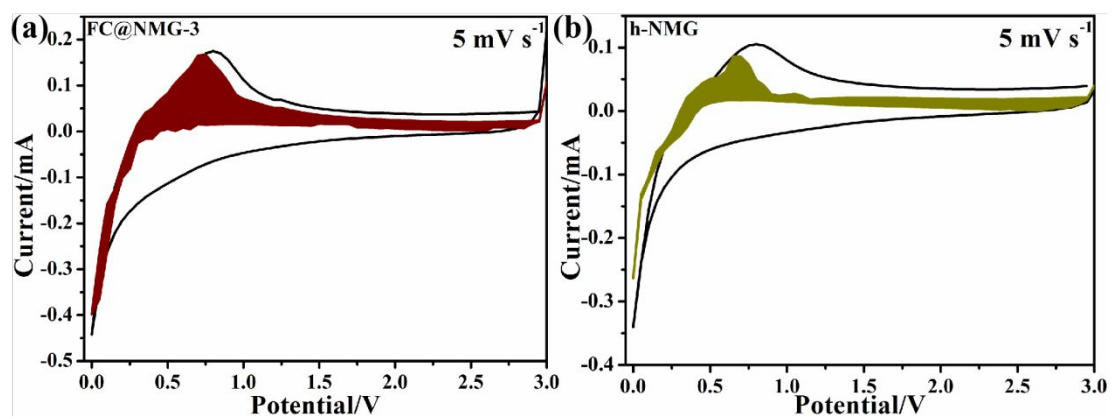

**Fig. S12** (a,b) The CV curve at a scan rate of  $5 \text{ mV s}^{-1}$  marking the pseudocapacity contribution in comparison to the total current.
